# Supplementary material for: The magnetic nature of disk accretion onto black holes
Source: Springer Nature journal article supplement (doi:10.1038/nature04912), 2006-06-01
Supplement: 41586_2006_BFnature04912_MOESM1_ESM.pdf [file 41586_2006_BFnature04912_MOESM1_ESM.pdf]

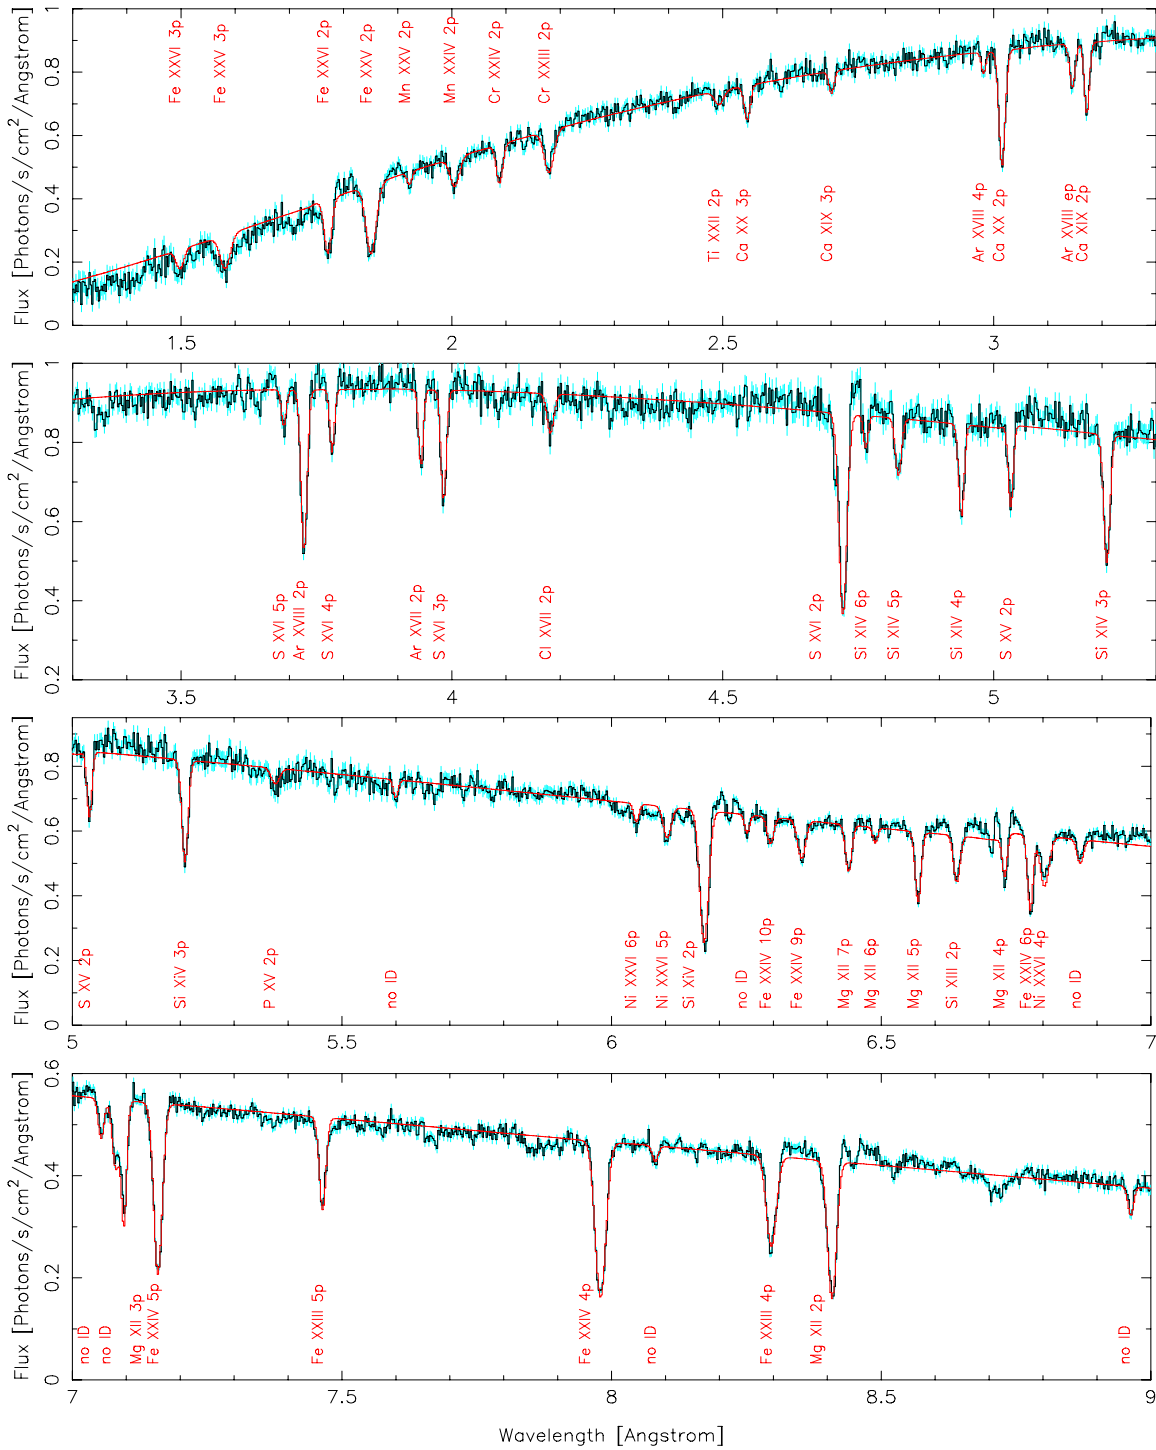

Supplementary Figure 1: The short wavelength portion of disk wind spectrum observed in the black hole GRO J1655–40 with Chandra. The data are shown in black,  $1\sigma$  error bars are plotted in blue, and fits including local continuum models and Gaussian line functions are shown in red. Identifications for the lines are given in red. The parameters measured via this complex absorption spectrum are detailed in Supplementary Tables 1 and 2.

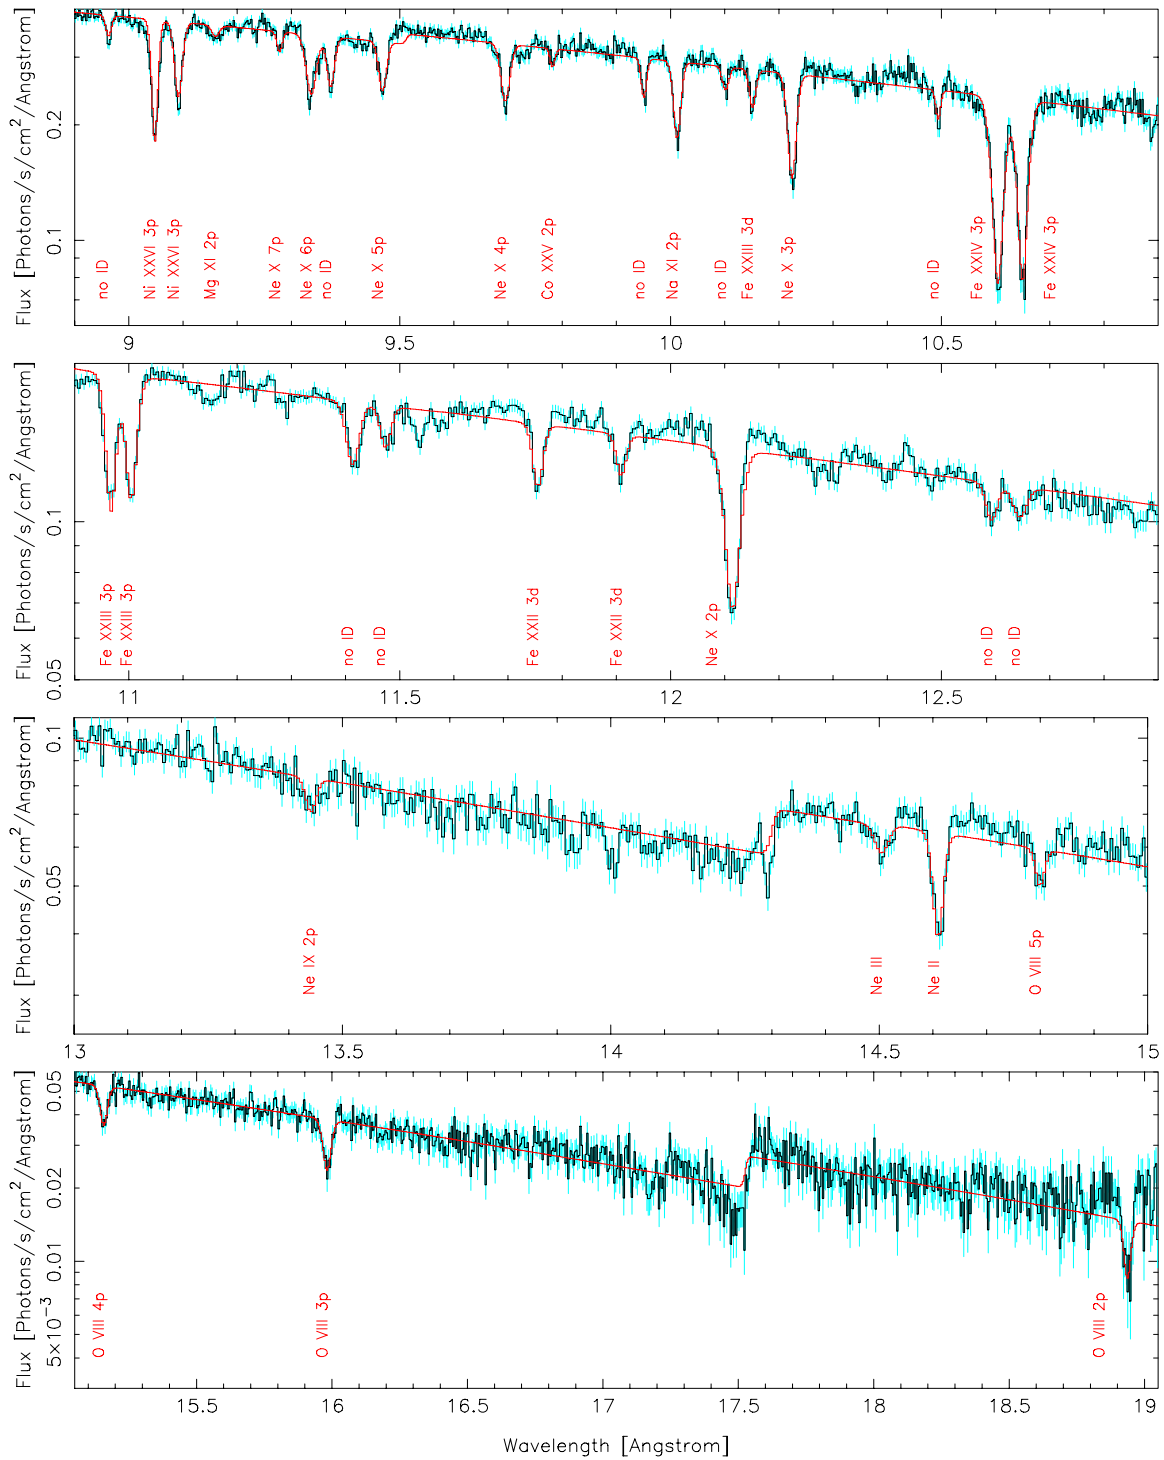

Supplementary Figure 2: The long wavelength portion of disk wind spectrum observed in the black hole GRO J1655–40 with Chandra. The data are shown in black,  $1\sigma$  error bars are plotted in blue, and fits including local continuum models and Gaussian line functions are shown in red. Identifications for the lines are given in red. The parameters measured via this complex absorption spectrum are detailed in Supplementary Tables 1 and 2.

| Ion and<br>Transition          | Meas.<br>(Å) | Theor.<br>(Å) | Shift<br>(km/s) | FWHM           |          | Flux ( $10^{-3}$<br>ph/cm <sup>2</sup> /s) | W<br>(mÅ) | N <sub>Z</sub> ( $10^{17}$<br>cm <sup>-2</sup> ) |
|--------------------------------|--------------|---------------|-----------------|----------------|----------|--------------------------------------------|-----------|--------------------------------------------------|
|                                |              |               |                 | ( $10^{-3}$ Å) | (km/s)   |                                            |           |                                                  |
| O VIII 1s – 5p                 | 14.800(2)    | 14.8206       | 420(40)         | < 10           | < 200    | 1.4(3)                                     | 23(5)     | 9(2)                                             |
| O VIII 1s – 4p                 | 15.157(2)    | 15.1762       | 380(40)         | 28(5)          | 550(80)  | 4.0(4)                                     | 77(8)     | 13(1)                                            |
| O VIII 1s – 3p                 | 15.982(2)    | 15.987        | 90(30)          | 31(5)          | 580(90)  | 5.1(5)                                     | 120(10)   | 7.5(8)                                           |
| O VIII 1s – 2p                 | 18.938(2)    | 18.9689       | 480(40)         | 24(5)          | 380(80)  | 1.2(2)                                     | 80(8)     | 0.7(1)                                           |
| Ne X 1s – 7p                   | 9.2786(6)    | 9.2912        | 410(20)         | 5(2)           | 200(100) | 1.3(2)                                     | 3.6(7)    | 10(2)                                            |
| Ne X 1s – 6p                   | 9.3365(6)    | 9.3616        | 800(20)         | 22(1)          | 700(40)  | 6.6(3)                                     | 22(1)     | 35(1)                                            |
| Ne X 1s – 5p                   | 9.4685(4)    | 9.4807        | 390(20)         | 14(1)          | 440(30)  | 4.1(3)                                     | 12(1)     | 11(1)                                            |
| Ne X 1s – 4p                   | 9.6949(5)    | 9.7082        | 410(10)         | 18(2)          | 560(50)  | 5.5(3)                                     | 16(1)     | 6.6(3)                                           |
| Ne X 1s – 3p                   | 10.2246(3)   | 10.2389       | 420(10)         | 17(1)          | 500(30)  | 8.3(2)                                     | 30(7)     | 4.1(1)                                           |
| Ne X 1s – 2p                   | 12.1152(5)   | 12.1330       | 550(10)         | 29(1)          | 720(20)  | 8.2(4)                                     | 57(3)     | 1.05(5)                                          |
| Ne IX 1s <sup>2</sup> – 1s2p   | 13.441(4)    | 13.4471       | 140(80)         | 14             | 300      | 1.8(4)                                     | 22(5)     | 0.20(5)                                          |
| Ne III                         | 14.504(3)    | 14.526        | 450(50)         | 20(10)         | 400(200) | 1.5(2)                                     | 22(3)     | 1.1(2)                                           |
| Ne II                          | 14.611(1)    | 14.631        | 410(20)         | 14(2)          | 300(30)  | 3.8(3)                                     | 58(5)     | 4.9(4)                                           |
| Na XI 1s – 2p                  | 10.0122(3)   | 10.0250       | 380(10)         | 13.2(5)        | 400(20)  | 5.6(2)                                     | 18.7(7)   | 0.51(2)                                          |
| Mg XII 1s – 7p                 | 6.4395(3)    | 6.4486        | 420(10)         | 9(1)           | 420(50)  | 3.2(1)                                     | 5.1(2)    | 28(1)                                            |
| Mg XII 1s – 6p                 | 6.4888(5)    | 6.4974        | 400(20)         | < 6            | < 300    | 0.8(1)                                     | 1.3(2)    | 4.4(6)                                           |
| Mg XII 1s – 5p                 | 6.5685(2)    | 6.5801        | 530(10)         | 8.0(5)         | 360(30)  | 4.7(1)                                     | 7.7(2)    | 14.4(4)                                          |
| Mg XII 1s – 4p                 | 6.7275(3)    | 6.7379        | 460(10)         | < 6            | < 300    | 2.5(1)                                     | 4.2(2)    | 3.6(2)                                           |
| Mg XII 1s – 3p                 | 7.0969(4)    | 7.1062        | 390(20)         | 5.4(5)         | 230(20)  | 3.9(3)                                     | 9.8(9)    | 2.8(3)                                           |
| Mg XII 1s – 2p                 | 8.4087(2)    | 8.4210        | 440(10)         | 16.7(3)        | 590(10)  | 9.6(1)                                     | 22.6(2)   | 0.87(1)                                          |
| Mg XI 1s <sup>2</sup> – 1s2p   | 9.159(2)     | 9.1688        | 320(70)         | 13             | 400      | 1.0(1)                                     | 2.7(3)    | 0.049(5)                                         |
| Si XIV 1s – 6p                 | 4.764(2)     | 4.7704        | 400(100)        | < 5.0          | < 300    | 1.0(1)                                     | 1.2(1)    | 7.5(8)                                           |
| Si XIV 1s – 5p                 | 4.8243(7)    | 4.8311        | 420(40)         | 9(2)           | 600(100) | 2.4(2)                                     | 2.8(2)    | 9.7(9)                                           |
| Si XIV 1s – 4p                 | 4.9407(3)    | 4.9469        | 380(20)         | 6(1)           | 360(60)  | 3.6(2)                                     | 4.2(2)    | 6.7(3)                                           |
| Si XIV 1s – 3p                 | 5.2090(3)    | 5.2172        | 470(20)         | 9.7(7)         | 560(40)  | 5.9(2)                                     | 7.2(2)    | 3.8(1)                                           |
| Si XIV 1s – 2p                 | 6.1721(1)    | 6.1822        | 490(10)         | 15.5(2)        | 750(10)  | 11.9(1)                                    | 18.5(2)   | 1.32(1)                                          |
| Si XIII 1s <sup>2</sup> – 1s2p | 6.6402(2)    | 6.6480        | 350(10)         | 10(1)          | 450(50)  | 3.4(1)                                     | 5.7(1)    | 0.19(1)                                          |
| P XV 1s – 2p                   | 5.375(2)     | 5.383         | 700(200)        | –              | 400      | 1.0(2)                                     | 1.3(3)    | 0.12(3)                                          |
| S XVI 1s – 5p                  | 3.690(1)     | 3.6959        | 480(80)         | < 5            | < 400    | 1.1(2)                                     | 1.2(2)    | 7(1)                                             |
| S XVI 1s – 4p                  | 3.780(1)     | 3.7845        | 360(80)         | < 5            | < 400    | 1.9(2)                                     | 2.0(2)    | 5.4(5)                                           |
| S XVI 1s – 3p                  | 3.9858(3)    | 3.9912        | 400(30)         | 6(1)           | 450(80)  | 3.9(2)                                     | 4.2(2)    | 3.8(2)                                           |
| S XVI 1s – 2p                  | 4.7221(2)    | 4.7292        | 450(10)         | 14.4(7)        | 910(50)  | 11.3(2)                                    | 12.8(2)   | 1.55(2)                                          |
| S XV 1s <sup>2</sup> – 1s2p    | 5.0318(4)    | 5.0387        | 410(20)         | < 5            | < 400    | 2.9(2)                                     | 3.4(2)    | 0.20(2)                                          |

Supplementary Table 1: Parameters of the disk wind absorption lines observed in GRO J1655–40 for elements with  $Z < 17$ . For clarity, the lines are listed by element in order of ascending atomic number, and in order of increasing wavelength by element and ion. The spectral continua were fit locally using power-law models modified by neutral photoelectric absorption edges (due to the interstellar medium) where appropriate. The lines were fit with simple Gaussian models. The errors quoted above are  $1\sigma$  uncertainties. Line significances were calculated by dividing line flux by its  $1\sigma$  error. Where errors are not given, the parameter was fixed at the quoted value. Line widths consistent with zero are not resolved.

| Ion and Transition                               | Meas. (Å)  | Theor. (Å) | Shift (km/s) | FWHM           |           | Flux ( $10^{-3}$ ph/cm <sup>2</sup> /s) | W (mÅ)  | N <sub>Z</sub> ( $10^{17}$ cm <sup>-2</sup> ) |
|--------------------------------------------------|------------|------------|--------------|----------------|-----------|-----------------------------------------|---------|-----------------------------------------------|
|                                                  |            |            |              | ( $10^{-3}$ Å) | (km/s)    |                                         |         |                                               |
| Cl XVII 1s - 2p                                  | 4.182(1)   | 4.187      | 400(100)     | 9(2)           | 600(200)  | 1.5(2)                                  | 1.6(2)  | 0.25(3)                                       |
| Ar XVIII 1s - 4p                                 | 2.981(1)   | 2.9875     | 700(100)     | < 5            | < 500     | 0.8(1)                                  | 0.9(1)  | 3.9(5)                                        |
| Ar XVIII 1s - 3p                                 | 3.1454(5)  | 3.1506     | 500(50)      | 6(1)           | 600(100)  | 2.0(2)                                  | 2.2(2)  | 3.2(3)                                        |
| Ar XVIII 1s - 2p                                 | 3.7271(2)  | 3.7329     | 470(20)      | 8.7(7)         | 700(50)   | 6.3(2)                                  | 8.0(3)  | 1.6(1)                                        |
| Ar XVII 1s <sup>2</sup> - 1s2p                   | 3.9429(4)  | 3.9488     | 450(30)      | < 5            | < 500     | 2.3(1)                                  | 2.6(1)  | 0.24(1)                                       |
| K XIX 1s - 2p                                    | -          | 3.348      | -            | -              | 800       | 1.0(2)                                  | 1.0(2)  | 0.24(5)                                       |
| Ca XX 1s - 3p                                    | 2.5452(6)  | 2.5494     | 490(70)      | 9(2)           | 1100(100) | 1.7(2)                                  | 2.2(2)  | 4.8(5)                                        |
| Ca XX 1s - 2p                                    | 3.0187(2)  | 3.0203     | 160(20)      | 9.2(7)         | 910(70)   | 5.75(7)                                 | 6.66(8) | 2.0(1)                                        |
| Ca XIX 1s <sup>2</sup> - 1s3p                    | 2.701(1)   | 2.7054     | 500(100)     | < 10           | < 1100    | 0.9(1)                                  | 1.1(1)  | 1.1(1)                                        |
| Ca XIX 1s <sup>2</sup> - 1s2p                    | 3.1722(3)  | 3.1772     | 470(30)      | < 10           | < 1100    | 2.9(2)                                  | 3.2(2)  | 0.46(4)                                       |
| Sc XXI 1s - 2p                                   | -          | 2.740      | -            | -              | 1500      | < 0.1                                   | < 0.13  | < 0.05                                        |
| Ti XXII 1s - 2p                                  | 2.493(2)   | 2.4966     | 430(240)     | 17(5)          | 2000(600) | 1.0(2)                                  | 1.3(3)  | 1.7(3)                                        |
| V XXIII 1s - 2p                                  | -          | 2.2794     | -            | -              | 1500      | < 0.7                                   | < 0.7   | < 0.4                                         |
| Cr XXIV 1s - 2p                                  | 2.0880(6)  | 2.0901     | 300(80)      | 10(2)          | 1400(300) | 2.0(2)                                  | 3.4(3)  | 6.3(6)                                        |
| Cr XXIII 1s <sup>2</sup> - 1s2p                  | 2.1794(6)  | 2.1821     | 370(80)      | 19(2)          | 2600(300) | 3.1(2)                                  | 4.8(3)  | 1.6(2)                                        |
| Mn XXV 1s - 2p                                   | 1.922(2)   | 1.9247     | 400(300)     | < 154          | < 2000    | 0.5(1)                                  | 1.0(2)  | 1.1(2)                                        |
| Mn XXIV 1s <sup>2</sup> - 1s2p                   | 2.005(1)   | 2.0062     | 200(140)     | 17(2)          | 2500(300) | 2.0(2)                                  | 3.7(4)  | 3.7(4)                                        |
| Fe XXVI 1s - 3p                                  | 1.498(2)   | 1.5028     | 1000(400)    | 12             | 2400      | 1.1(2)                                  | 5(1)    | 32(6)                                         |
| Fe XXVI 1s - 2p                                  | 1.7714(5)  | 1.7798     | 1400(100)    | 12(1)          | 2400(200) | 3.1(2)                                  | 7.8(5)  | 6.7(4)                                        |
| Fe XXV 1s <sup>2</sup> - 1s3p                    | 1.581(1)   | 1.5732     | 1500(200)    | 20             | 3800      | 2.6(2)                                  | 9.7(9)  | 28(3)                                         |
| Fe XXV 1s <sup>2</sup> - 1s2p                    | 1.8510(4)  | 1.8504     | 0(100)       | 20(1)          | 3800(300) | 5.4(2)                                  | 12.6(5) | 5.2(2)                                        |
| Fe XXIV 1s <sup>2</sup> 2s - 1s <sup>2</sup> 10p | 6.2946(5)  | 6.3055     | -            | 10(1)          | 480(40)   | 1.8(2)                                  | 2.8(3)  | 21(1)                                         |
| Fe XXIV 1s <sup>2</sup> 2s - 1s <sup>2</sup> 9p  | 6.3523(4)  | 6.3475     | -            | 14(1)          | 660(50)   | 3.3(2)                                  | 5.2(3)  | 28(2)                                         |
| Fe XXIV 1s <sup>2</sup> 2s - 1s <sup>2</sup> 8p  | blend      | -          | -            | -              | -         | -                                       | -       | -                                             |
| Fe XXIV 1s <sup>2</sup> 2s - 1s <sup>2</sup> 7p  | blend      | -          | -            | -              | -         | -                                       | -       | -                                             |
| Fe XXIV 1s <sup>2</sup> 2s - 1s <sup>2</sup> 6p  | 6.7773(2)  | 6.7870     | 430(10)      | 8.2(5)         | 360(20)   | 5.4(1)                                  | 10.2(2) | 11.9(2)                                       |
| Fe XXIV 1s <sup>2</sup> 2s - 1s <sup>2</sup> 5p  | 7.1590(1)  | 7.1690     | 420(10)      | 15.8(2)        | 660(10)   | 10.37(3)                                | 19.3(1) | 10.6(1)                                       |
| Fe XXIV 1s <sup>2</sup> 2s - 1s <sup>2</sup> 4p  | 7.9795(1)  | 7.9893     | 370(10)      | 20.2(1)        | 760(10)   | 13.1(2)                                 | 28.2(4) | 5.15(7)                                       |
| Fe XXIV 1s <sup>2</sup> 2s - 1s <sup>2</sup> 3p  | 10.6043(3) | 10.619     | 420(10)      | 27.3(7)        | 770(20)   | 13.7(4)                                 | 60(1)   | 2.30(4)                                       |
| Fe XXIV 1s <sup>2</sup> 2s - 1s <sup>2</sup> 2p  | 10.6494(3) | 10.663     | 380(10)      | 23.8(5)        | 670(20)   | 11.9(2)                                 | 52(1)   | 3.95(5)                                       |
| Fe XXIII 2s <sup>2</sup> - 2s5p                  | 7.4639(2)  | 7.4722     | 330(10)      | 11.6(5)        | 470(20)   | 4.15(4)                                 | 8.2(1)  | 2.27(4)                                       |
| Fe XXIII 2s <sup>2</sup> - 2s4p                  | 8.2963(2)  | 8.3029     | 240(10)      | 18.1(5)        | 650(20)   | 7.0(1)                                  | 16.3(2) | 1.49(2)                                       |
| Fe XXIII 2s <sup>2</sup> - 2p3d                  | 10.1512(6) | 10.175     | 700(20)      | 10(2)          | 290(60)   | 2.7(2)                                  | 16(2)   | 5.3(7)                                        |
| Fe XXIII 2s <sup>2</sup> - 2p3s                  | -          | 10.560     | -            | -              | -         | -                                       | -       | -                                             |
| Fe XXIII 2s <sup>2</sup> - 2s3p                  | 10.9671(3) | 10.981     | 380(10)      | 16(1)          | 440(30)   | 7.0(3)                                  | 40(2)   | 0.54(3)                                       |
| Fe XXIII 2s <sup>2</sup> - 2s3p4                 | 11.0049(5) | 11.018     | 360(10)      | 17(1)          | 460(30)   | 6.8(3)                                  | 33(2)   | 1.1(1)                                        |
| Fe XXII 2s <sup>2</sup> 2p - 2s <sup>2</sup> 3d  | 11.755(1)  | 11.770     | 380(20)      | 14(2)          | 360(50)   | 2.4(3)                                  | 14(2)   | 0.17(2)                                       |
| Fe XXII 2s <sup>2</sup> 2p - 2s <sup>2</sup> 3d  | 11.909(2)  | 11.920     | 280(50)      | 10(2)          | 250(50)   | 1.8(3)                                  | 11(2)   | 0.15(2)                                       |
| Ni XXVI 1s <sup>2</sup> 2s - 1s <sup>2</sup> 6p  | 6.045(1)   | -          | -            | 9.2(5)         | 450(30)   | 1.4(2)                                  | 2.1(3)  | -                                             |
| Ni XXVI 1s <sup>2</sup> 2s - 1s <sup>2</sup> 5p  | 6.103(1)   | 6.120      | 830(50)      | 16(2)          | 800(100)  | 2.6(2)                                  | 3.9(4)  | 4.2(5)                                        |
| Ni XXVI 1s <sup>2</sup> 2s - 1s <sup>2</sup> 4p  | 6.8029(4)  | 6.8163     | 650(20)      | 27(1)          | 1200(50)  | 5.7(1)                                  | 9.5(2)  | 2.3(1)                                        |
| Ni XXVI 1s <sup>2</sup> 2s - 1s <sup>2</sup> 3p  | 9.0479(2)  | 9.061      | 430(10)      | 15.1(5)        | 500(20)   | 6.6(1)                                  | 18.5(3) | 1.04(1)                                       |
| Ni XXVI 1s <sup>2</sup> 2s - 1s <sup>2</sup> 3p  | 9.0917(4)  | 9.105      | 440(10)      | 11.8(4)        | 400(30)   | 4.5(1)                                  | 12.4(3) | 1.31(3)                                       |
| Co XXV 1s <sup>2</sup> 2s - 1s <sup>2</sup> 3p   | 9.782(1)   | 9.795      | 400(40)      | 8(4)           | 200(100)  | 1.0(2)                                  | 3.2(6)  | 0.15(3)                                       |
| no ID; Al XIII 1s - 5p ?                         | 5.600(1)   | -          | -            | 6(2)           | 400       | 0.85(15)                                | 1.1(2)  | -                                             |
| no ID; Ni XXVI 2p - 5d ?                         | 6.250(1)   | -          | -            | < 4            | < 200     | 1.0(2)                                  | 1.5(3)  | -                                             |
| no ID; Ni XXVI 2p - 4s ?                         | 7.0555(8)  | -          | -            | 7(2)           | 300(100)  | 1.3(1)                                  | 2.4(2)  | -                                             |
| no ID; Ni XXVI 2p - 4d ?                         | 7.0815(8)  | -          | -            | 12(2)          | 500(100)  | 3.0(3)                                  | 5.4(5)  | -                                             |
| no ID; Ni XXVI 2p - 3d ?                         | 9.3726(4)  | -          | -            | 14(1)          | 450(30)   | 4.2(2)                                  | 12.3(6) | -                                             |
| no ID; Ni XXV 2s2p - 2s3d ?                      | 9.9509(5)  | -          | -            | 6(2)           | 200(50)   | 2.3(2)                                  | 7.7(6)  | -                                             |
| no ID                                            | 6.8690(5)  | -          | -            | 10(2)          | 440(80)   | 1.7(1)                                  | 2.9     | -                                             |
| no ID                                            | 8.081(2)   | -          | -            | 7(2)           | 260(80)   | 0.6(1)                                  | 1.4     | -                                             |
| no ID                                            | 8.960(1)   | -          | -            | < 5            | < 200     | 1.0(1)                                  | 2.6     | -                                             |
| no ID                                            | 10.1015(6) | -          | -            | 12(5)          | 400(100)  | 1.7(2)                                  | 5.8     | -                                             |
| no ID                                            | 10.494(1)  | -          | -            | 3(3)           | 100(100)  | 1.5(2)                                  | 6.2     | -                                             |
| no ID                                            | 11.413(2)  | -          | -            | 57(9)          | 1500(200) | 7(1)                                    | 38.9    | -                                             |
| no ID                                            | 11.472(2)  | -          | -            | 12(5)          | 300(100)  | 1.6(3)                                  | 10.7    | -                                             |
| no ID                                            | 12.593(2)  | -          | -            | 19(7)          | 500(200)  | 2.3(4)                                  | 19.5    | -                                             |
| no ID                                            | 12.644(3)  | -          | -            | 24(7)          | 600(100)  | 2.1(4)                                  | 18.7    | -                                             |

Supplementary Table 1: Parameters of the disk wind absorption lines observed in GRO J1655-40 for elements with  $Z \geq 17$ . For clarity, the lines are listed by element in order of ascending atomic number, and in order of increasing wavelength by element and ion. The spectral continua were fit locally using power-law models modified by neutral photoelectric absorption edges (due to the interstellar medium) where appropriate. The lines were fit with simple Gaussian models. The errors quoted above are  $1\sigma$  uncertainties. Line significances were calculated by dividing line flux by its  $1\sigma$  error. Where errors are not given, the parameter was fixed at the quoted value. Line widths consistent with zero are not resolved.
